# Supplementary material for: Mesencephalic astrocyte-derived neurotrophic factor is secreted from interferon-γ–activated tumor cells through ER calcium depletion
Source: PubMed Central journal article supplement (PMC8064521; doi:10.1371/journal.pone.0250178), 2021-04-23

# Figure 1.B

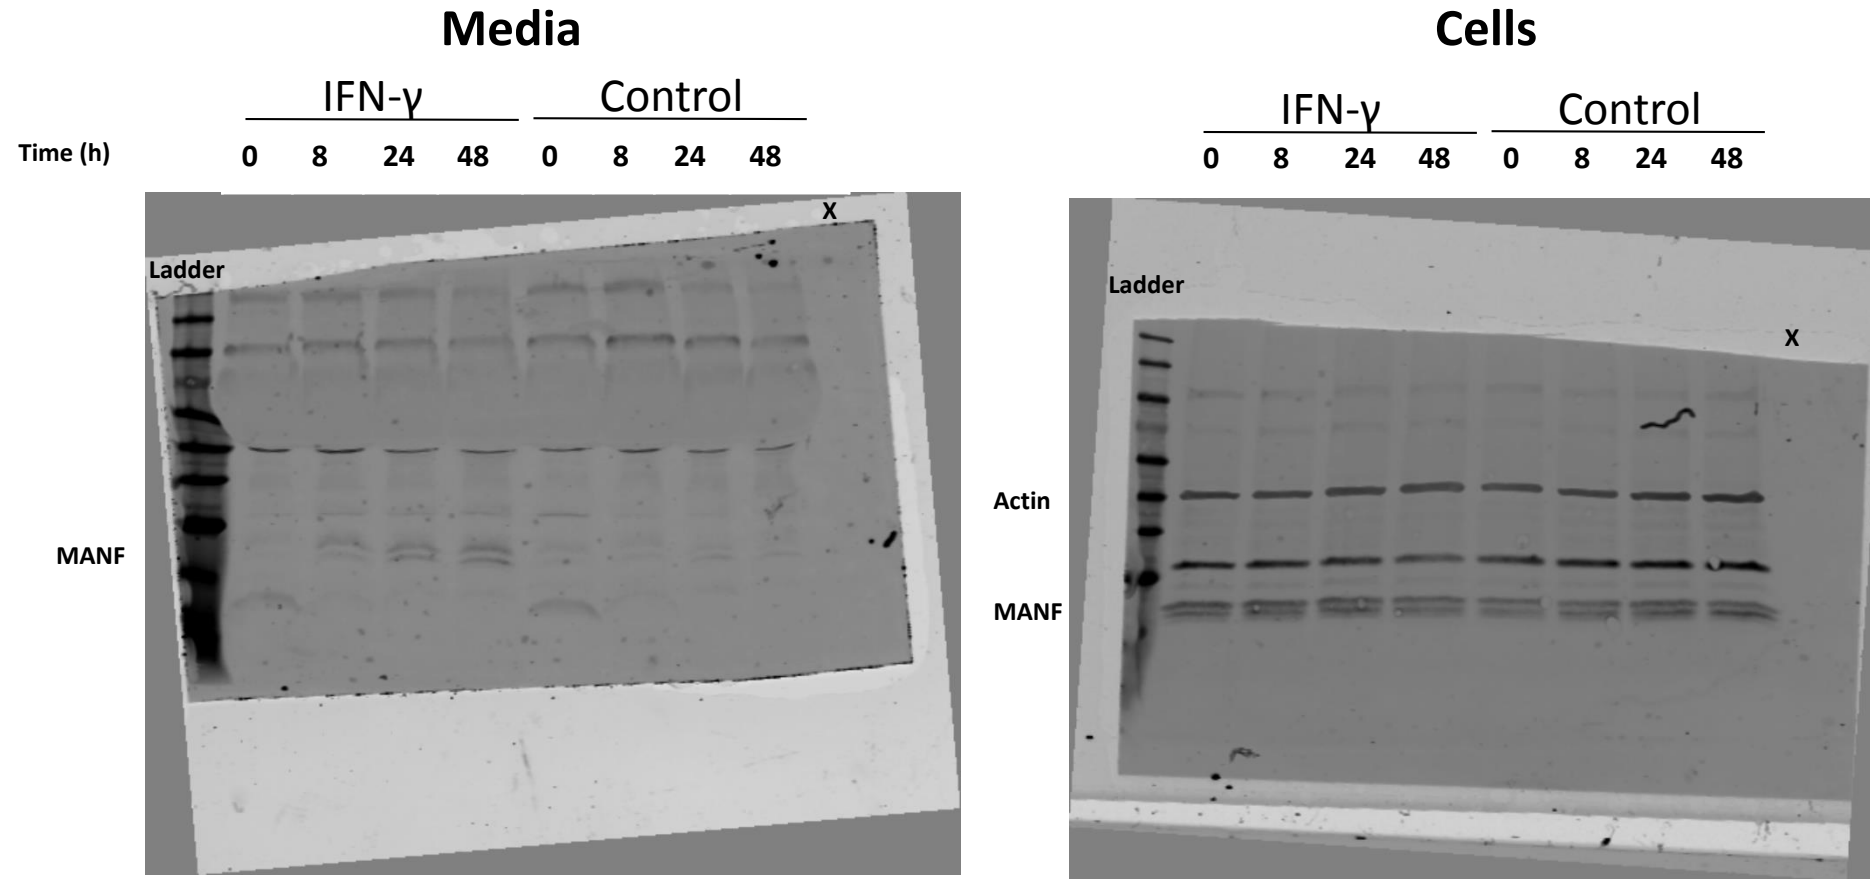

Images were acquired on Odyssey CLx Imaging system, using 2 secondary antibodies with different fluorescent probes simultaneously, thus both Actin and MANF can be observed simultaneously.

# Figure 1.E

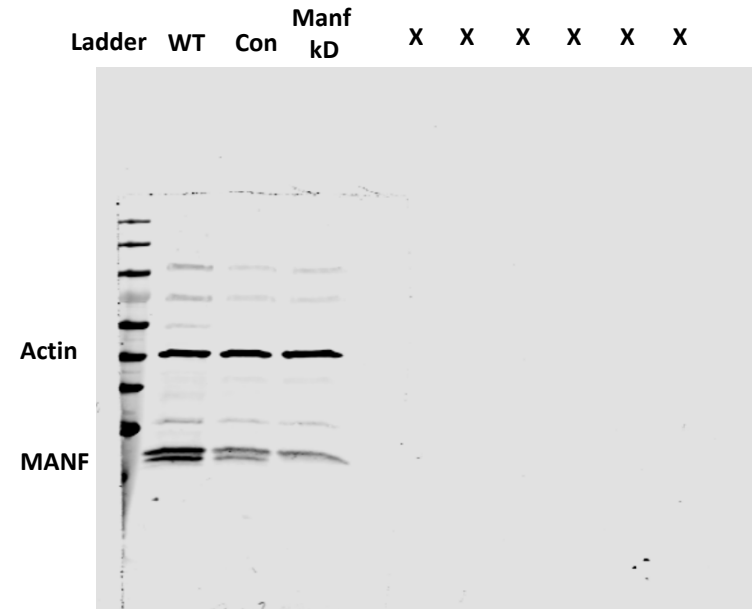



# Figure 2.C

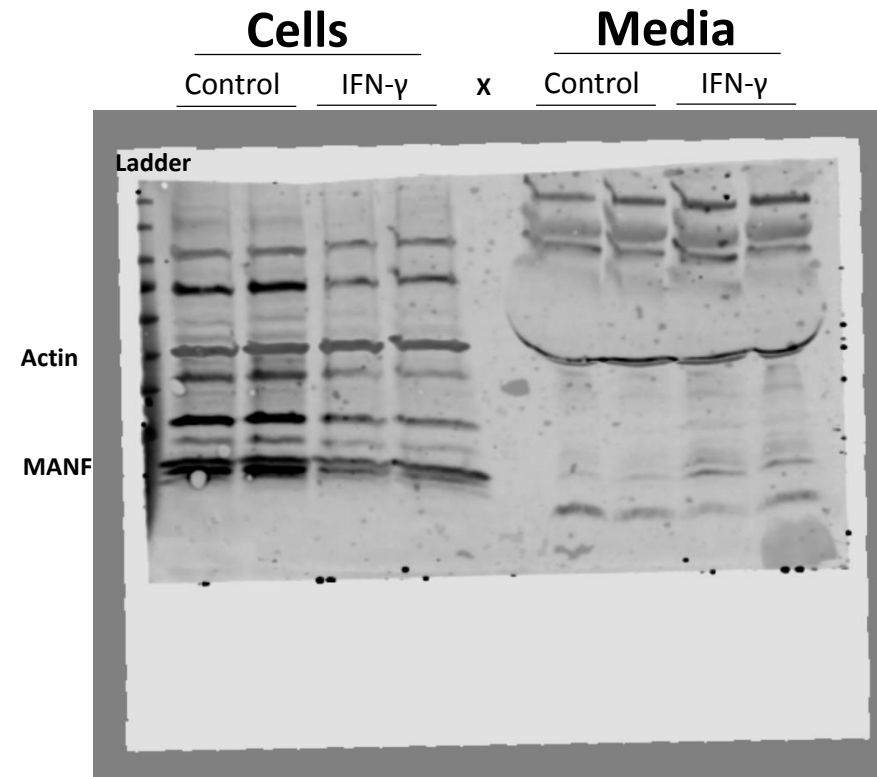

# Figure 3.A

## Cells

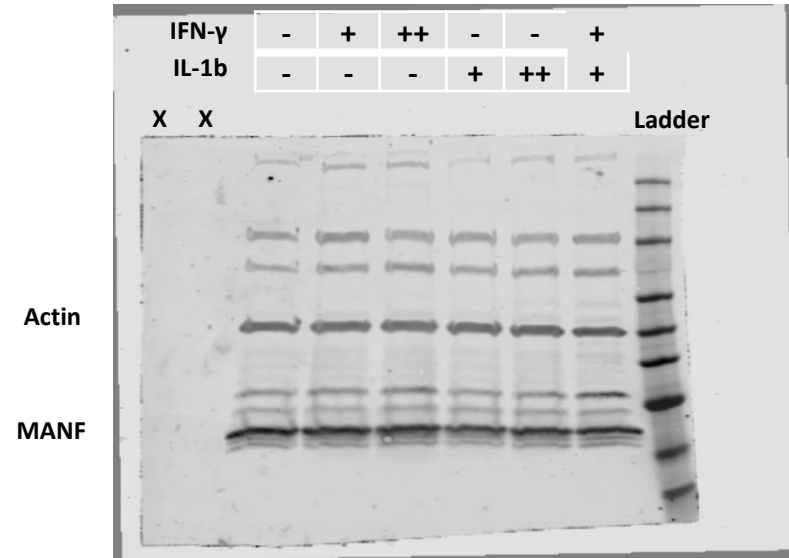

## Media

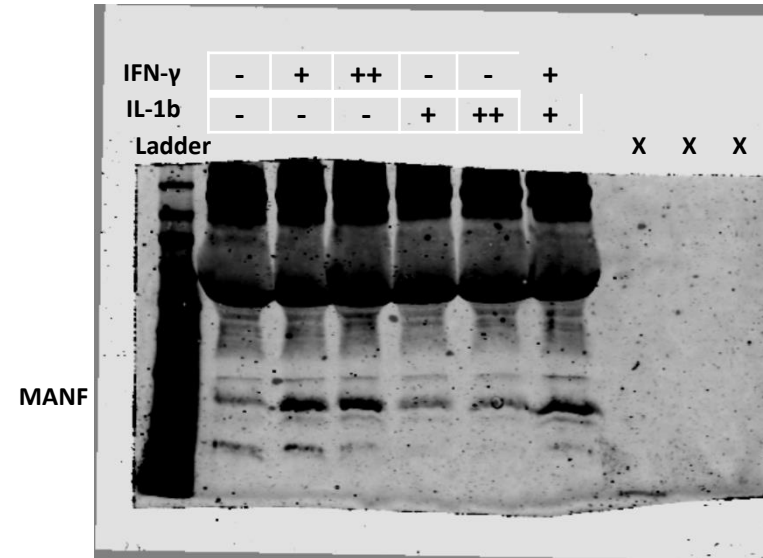

# Figure 5.A

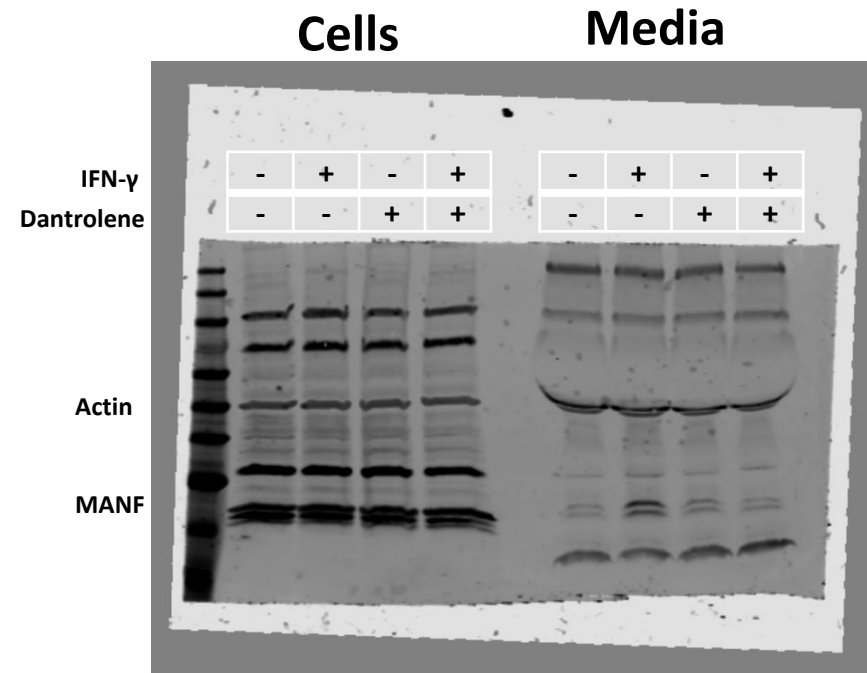

Supplement: pone.0250178.s001.pdf [file pone.0250178.s001.pdf]
